# Supplementary material for: Interactions of Prototype Foamy Virus Capsids with Host Cell Polo-Like Kinases Are Important for Efficient Viral DNA Integration
Source: PubMed Central journal article supplement (PMC5006980; doi:10.1371/journal.ppat.1005860), 2016-08-31

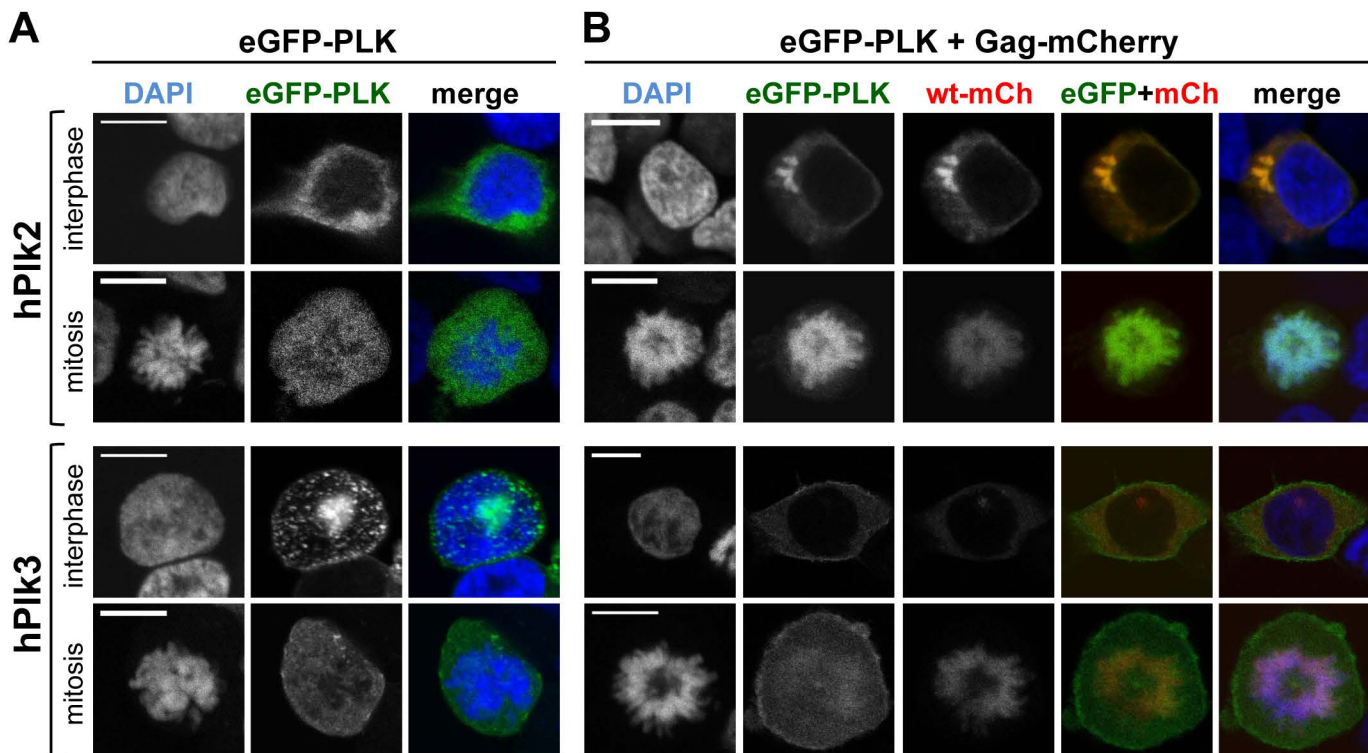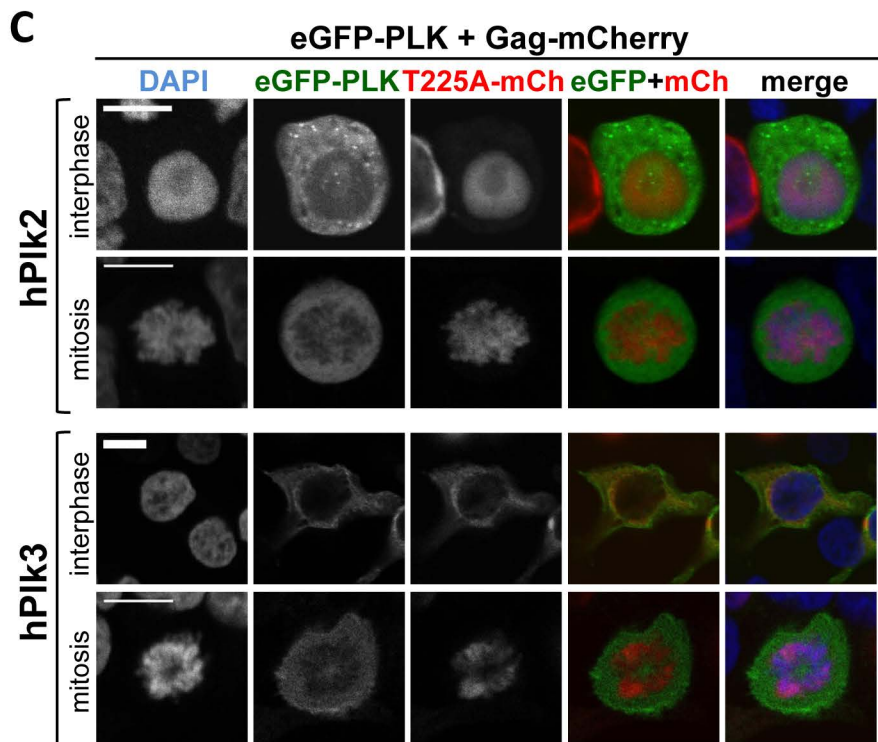

**D****eGFP-PLK + Gag-mCherry**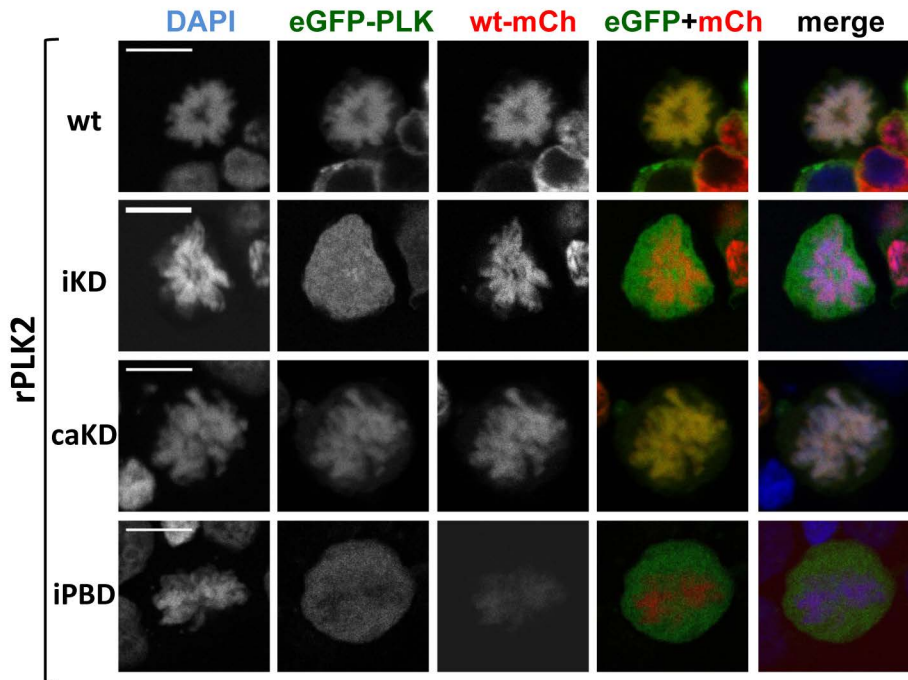

Supplement: ppat.1005860.s003.pdf [file ppat.1005860.s003.pdf]
