# Supplementary material for: Interactions of Prototype Foamy Virus Capsids with Host Cell Polo-Like Kinases Are Important for Efficient Viral DNA Integration
Source: PubMed Central journal article supplement (PMC5006980; doi:10.1371/journal.ppat.1005860), 2016-08-31
Supplement: ppat.1005860.s008.pdf [file ppat.1005860.s008.pdf]

| <b>Target</b>         | <b>Primer/Probe</b> | <b>5'-3' Sequence<sup>a</sup></b>     | <b>Cycle Conditions</b>              |
|-----------------------|---------------------|---------------------------------------|--------------------------------------|
| PFV genome (LTR R-U5) | fwd                 | TAAGGGTGATTGCAATGCTT                  | 95 °C, 8 min, 1x                     |
|                       | rev                 | ATGTCTCCCTTAGCAAGGCT                  | 95 °C, 30 s, 40x                     |
|                       | probe               | FAM-TCAATAAACCGACTTGATTTCGAGAACC-BHQ1 | 59 °C, 30 s, 40x<br>72 °C, 30 s, 40x |
| EGFP                  | fwd                 | GCAGTGCTTCAGCCGCTAC                   | 95 °C, 8 min, 1x                     |
|                       | rev                 | AAGAAGATGGTGCGCTCCTG                  | 95 °C, 30 s, 40x                     |
|                       | probe               | HEX-CCGACCACATGAAGCAGCACGACTT-BHQ2    | 59 °C, 30 s, 40x<br>72 °C, 45 s, 40x |
| GAPDH                 | fwd                 | CATCAATGGAAATCCCATCA                  | 95 °C, 8 min, 1x                     |
|                       | rev                 | GACTCCACGACGTACTIONCAGC               | 95 °C, 30 s, 40x                     |
|                       | probe               | FAM-TCCAGGAGCGAGATCCCTCCA-BHQ1        | 59 °C, 30 s, 40x<br>72 °C, 30 s, 40x |
